# Supplementary material
Source: MDPI journal article supplement (https://www.mdpi.com/2073-445X/12/1/162)
Supplement: s1 [file s1]

## Supplement of

# Long-Term Variations in Warm and Cold Events in Nanjing, China: Roles of Synoptic Weather Patterns and Urbanization

Weishou Tian, Lian Zong, Yakun Dong, Duanyang Liu and Yuanjian Yang

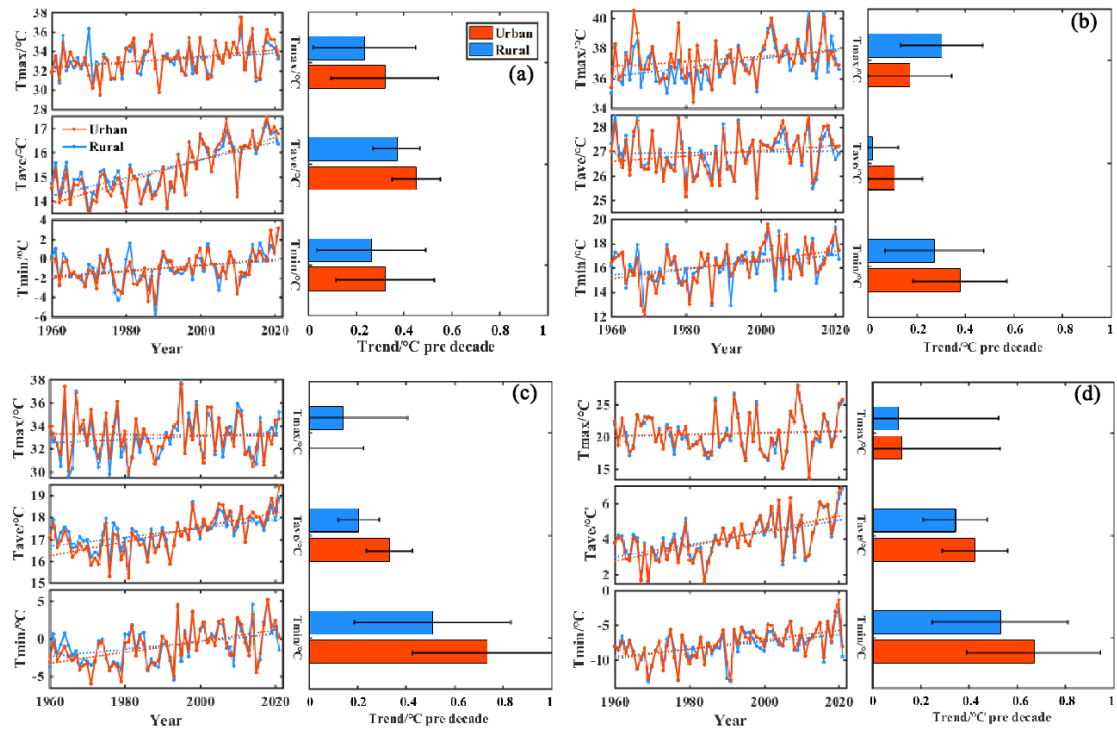

Figure S1. Time series of maximum/mean/minimum temperature in urban areas and rural areas during 1960–2021: (a) Spring; (b) Summer; (c) Autumn; (d) Winter. The red and blue dashed lines in the left-hand panel and the columns in the right-hand panel indicate their corresponding linear trends. Error bars in the right-hand panels indicate the 95% confidence interval.

Table S1. Interannual and intraseasonal trends in urban and rural warm days; cold days; warm nights; cold nights, along with the contribution of urbanization. (Statistical significance level at the 0.05 is denoted by \*, and a tilde (~) indicates that the effect of urbanization failed the 0.05 significance test and no calculation of the urbanization contribution was performed).

| Time                  | Urban (warm day/warm night/cold day/cold night) Frequency Trends (day/decade) | Rural (warm day/warm night/cold day/cold night) Frequency Trends (day/decade) | Urbanization contribution rate(%) |
|-----------------------|-------------------------------------------------------------------------------|-------------------------------------------------------------------------------|-----------------------------------|
| Interannual variation | 0.45/1.74*/-1.32*/-3.18*                                                      | 1.45*/1.82*/-1.15/-2.48*                                                      | ~-4.6/~/-22.01                    |
| Spring                | 0.29*/0.28/-0.3/-0.41*                                                        | 0.27*/0.33*/-0.25/-0.48*                                                      | 6.7/~/-17.07                      |
| Summer                | 0.45/1.17*/0.08/-0.7*                                                         | 1.05*/0.85*/0.11/-0.62*                                                       | ~/27.35/~/-11.43                  |
| Autumn                | 0.03/0.44/-0.18/-0.81*                                                        | 0.41/0.26/-0.24/-0.52*                                                        | ~/~/~-35.8                        |
| Winter                | 0.01/0.47*/-0.42/-1.21*                                                       | 0.01/0.65*/-0.51/-0.73*                                                       | ~/-38.3/~/-39.67                  |
